# Supplementary material
Source: publisher figshare collection journal article supplement (https://rs.figshare.com/ndownloader/files/15311639)

## Supplementary Information.

**Table S1.** Mean standardized concentration of individual metals in control and limed soil microcosms. The final column summarizes the results of one-tailed t-tests comparing standardized treatment differences to zero, corrected for multiple testing (in italics). Metals are listed from rare to most common.

| Heavy metal | Standardized mean [95% CI]  |                             | P-value (a   <i>b</i> *)    |
|-------------|-----------------------------|-----------------------------|-----------------------------|
|             | Control                     | Lime                        |                             |
| Ag          | 0.499 [0.006, 0.993]        | 1.484 [0.260, 2.708]        | 0.932   <i>0.932</i>        |
| Cd          | 0.948 [-0.145, 2.042]       | 1.053 [0.583, 1.523]        | 0.553   <i>0.671</i>        |
| Cr          | 1.170 [0.244, 2.096]        | 0.830 [0.484, 1.176]        | 0.249   <i>0.456</i>        |
| Co          | 1.103 [0.182, 2.023]        | 0.897 [0.539, 1.523]        | 0.338   <i>0.532</i>        |
| Mn          | 1.333 [0.518, 2.148]        | 0.678 [0.347, 1.009]        | 0.029   <i>0.068</i>        |
| <b>Cu</b>   | <b>1.150 [0.880, 1.421]</b> | <b>0.845 [0.768, 0.951]</b> | <b>0.009   <i>0.047</i></b> |
| Zn          | 1.161 [0.705, 1.617]        | 0.839 [0.639, 1.062]        | 0.031   <i>0.068</i>        |
| Ni          | 0.964 [0.569, 1.359]        | 1.036 [0.694, 1.378]        | 0.610   <i>0.671</i>        |
| <b>Al</b>   | <b>1.233 [0.714, 1.752]</b> | <b>0.767 [0.375, 1.159]</b> | <b>0.006   <i>0.047</i></b> |
| Mg          | 1.123 [0.670, 1.588]        | 0.871 [0.552, 1.190]        | 0.014   <i>0.052</i>        |
| Fe          | 0.976 [0.403, 1.548]        | 1.024 [0.643, 1.406]        | 0.560   <i>0.671</i>        |

\* P-values were corrected for multiple testing (*'p.adjust'* function with method = *fd*r).

**Figure S1. Relative abundance of common phyla before ( $T_0$ ) and after experimental manipulation: microbial communities were incubated for 12 weeks in paired soil microcosms that were either supplemented with (L) a single dose of hydrated lime (L) or an equal volume of sterilized *ddH2O* (C).**

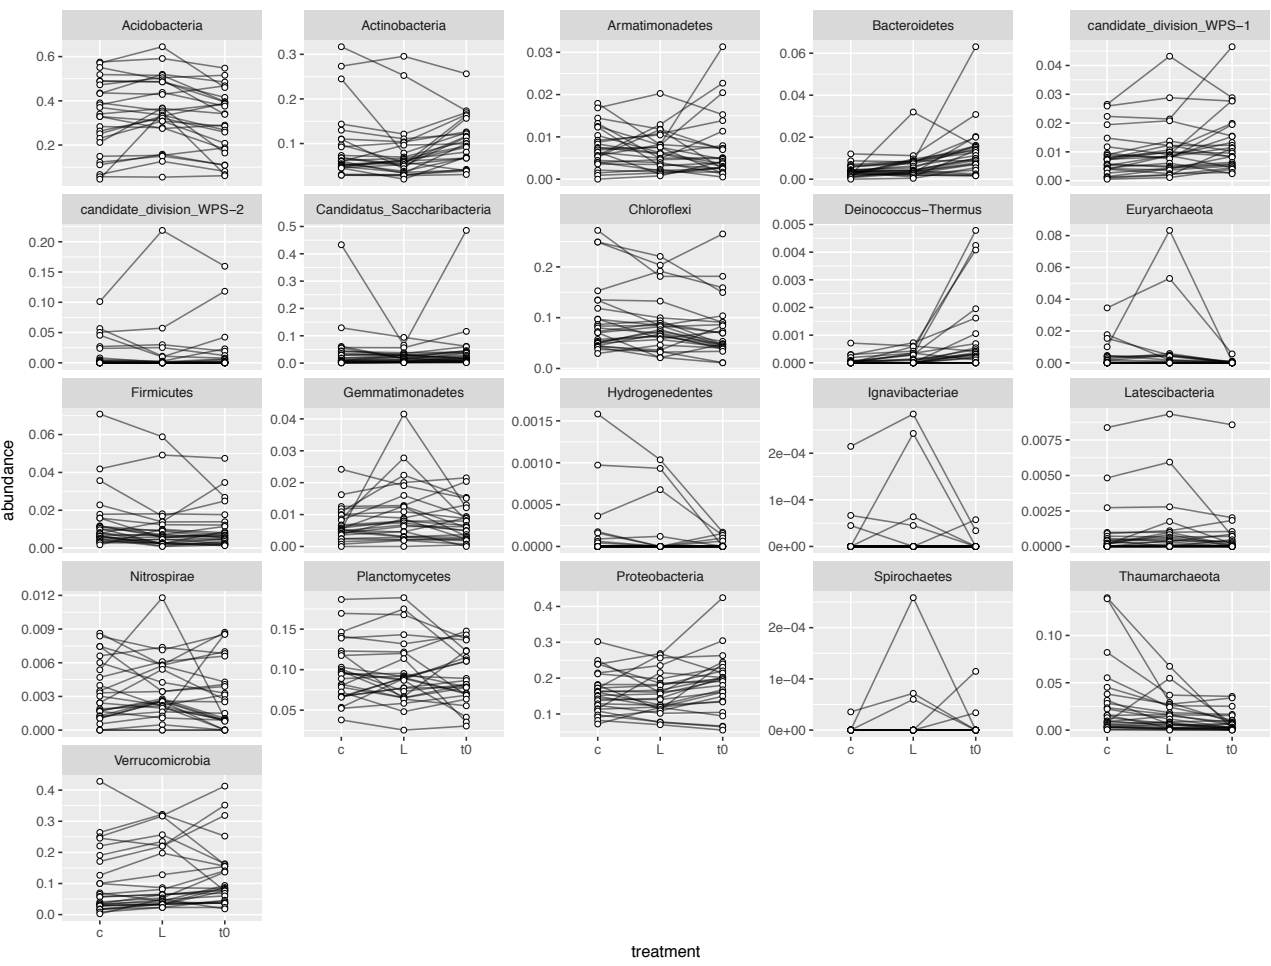

Supplement: Supplementary file [file 15311639]
